# Supplementary material for: The Virtual Skeleton Database: An Open Access Repository for Biomedical Research and Collaboration
Source: PubMed Central journal article supplement (PMC3841349; doi:10.2196/jmir.2930), 2013-11-12
Supplement: jmir_v15i11e245_app10.pdf [file jmir_v15i11e245_app10.pdf]

 VIRTUAL**SKELETON** database

# An open access repository for biomedical research and collaboration

Michael Kistler, MSc

University of Bern, Switzerland

Institute for Surgical Technologies and Biomechanics

Michael Kistler<sup>#</sup>, Marcel Pfahrer<sup>+</sup>, Roman Niklaus<sup>+</sup>, Viktor Tomas<sup>+</sup>, Philippe Buechler<sup>#</sup>

<sup>#</sup>Institute for Surgical Technology and Biomechanics, University of Bern, Switzerland

<sup>+</sup>Engineering and Information Technology, Bern University of Applied Sciences,  
Switzerland

## VSD medical image analysis

- > Image data
  - CT, MRI, UltraSound
- > Processed data
  - Segmentation
  - Surface model
- > Models
  - Statistical shape model (population analysis)
  - Biomechanical model (subject specific analysis)

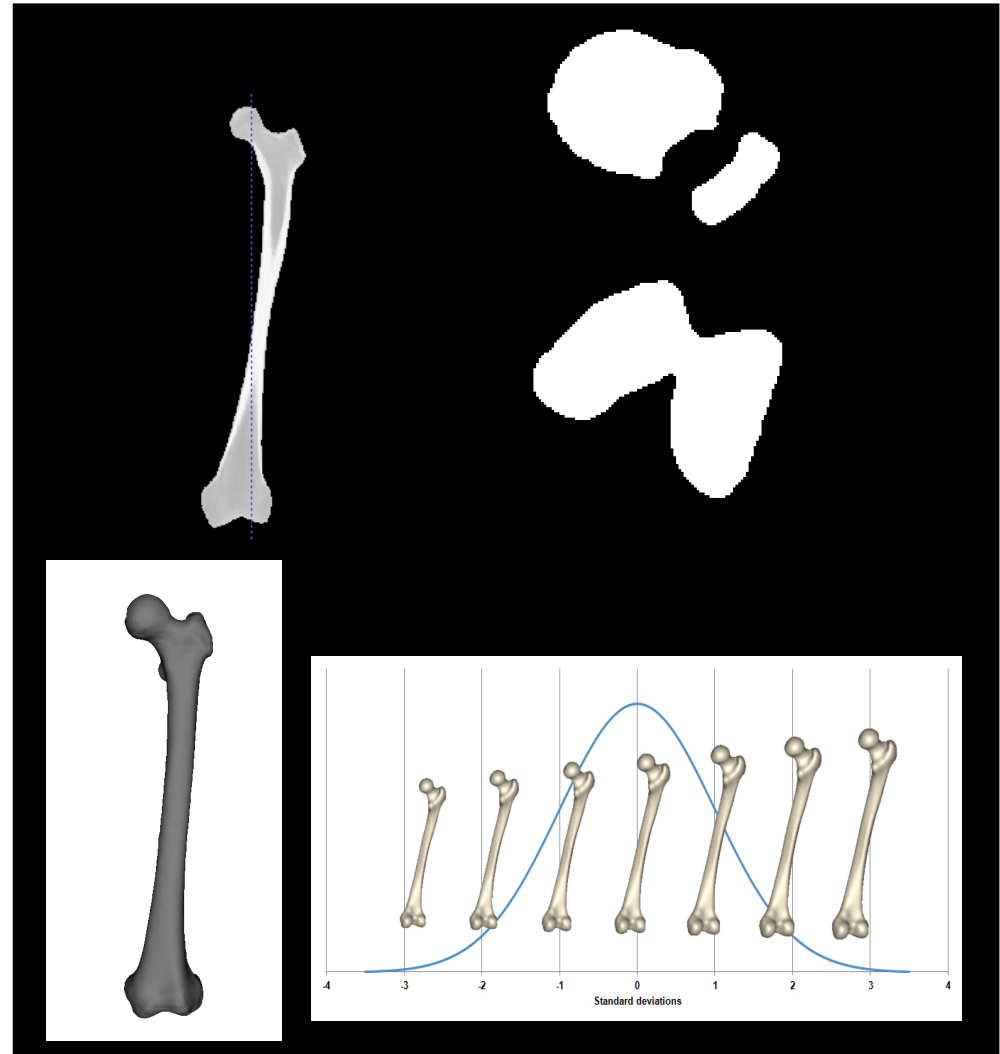

## VSD Motivation

- > Image management difficulties:
  - No adequate image data management systems for research
  - Redundant acquisition work, multiple copies / versions / miss-handling
  
- > Statistical shape model: **Difficult to obtain relevant data**
  - Large amount of data required
  - Preferably good quality with meta-data
  - Redundant processing work
  
- > Need to be able to store, track, find, exchange **images and processed data which contain anatomical structures**

## **Aims**

- > Eliminate limiting factors which prevent the fast creation
  - For testing and the application of medical image analysis methods
  - Of high quality statistical models
  
- > Open access research repository
  
- > Ultimately build a statistical human anatomy model

## VSD Custom solution?

- > NeuroImaging Archive Toolkit (XNAT)
  - Patient specific, PACS like storage

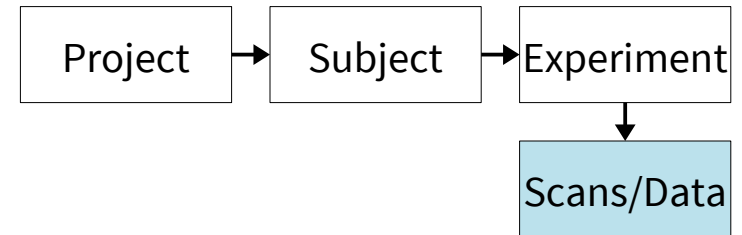

- > MIDAS media archiving platform
  - Cloud storage, archiving

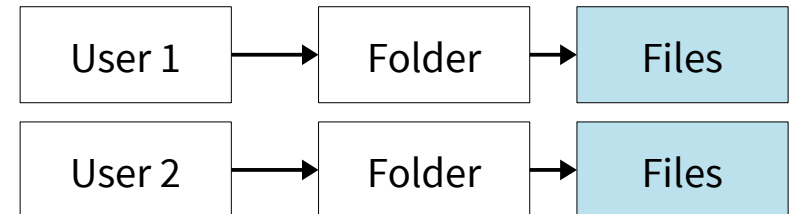

- > VSD Research image repository
  - Data object centric catalog

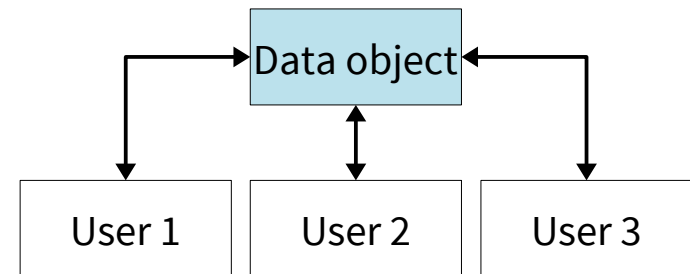

## VSD Architecture

- > Redundant hardware & software setup
  - MS Server 2008
  - MS IIS 7.5
  - MS SQL 2008
  - MS .NET (MVC 4, Razr)
  - SSL
- > Frameworks / Libraries
  - Bootstrap, jQuery, HTML, CSS, js (Web)
  - ClearCanvas (DICOM)
  - ITK / VTK (IA)
  - Statismo, HDF5 (SSM)
  - REST (api)
  - Sphorium WebDAV
  - Fuseki (FMA ontology)

# VSD Uploader

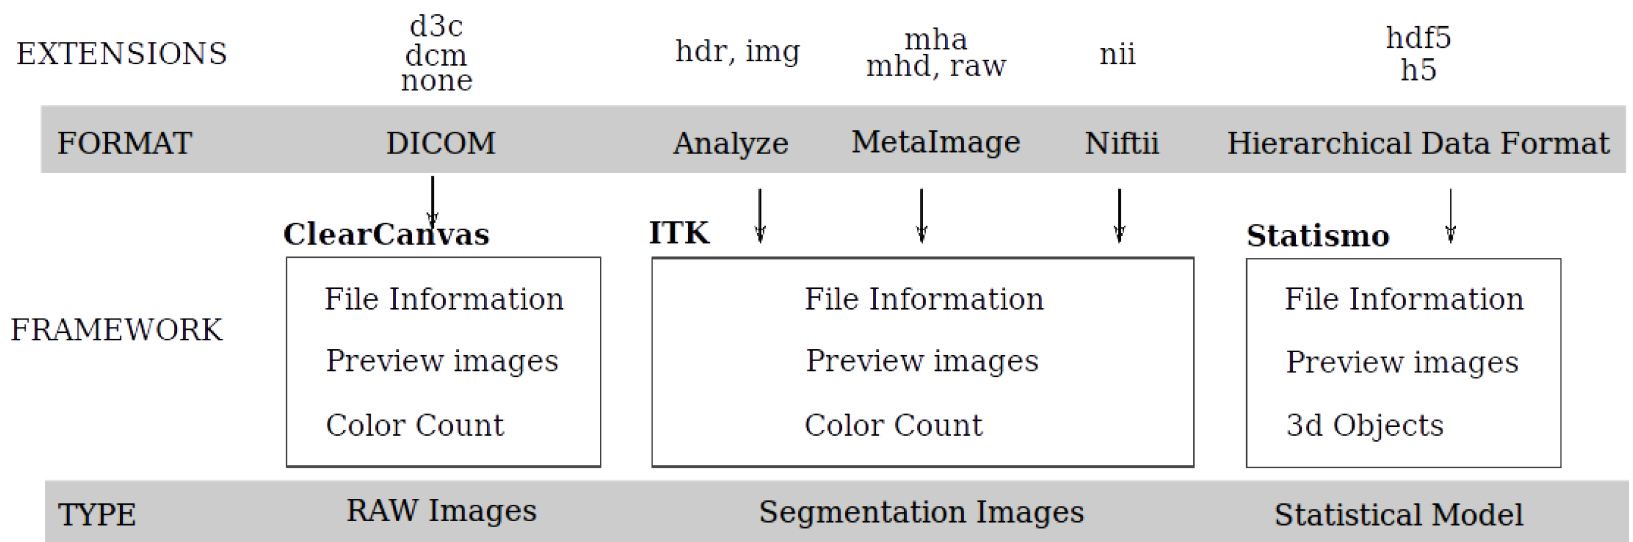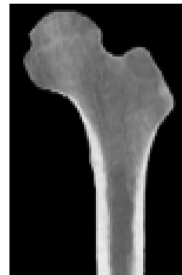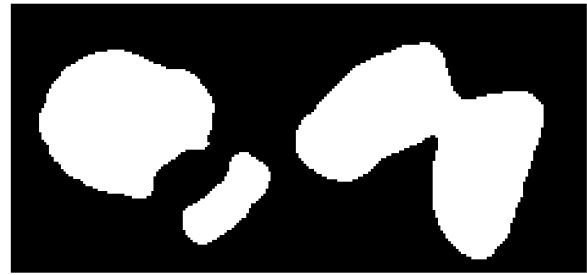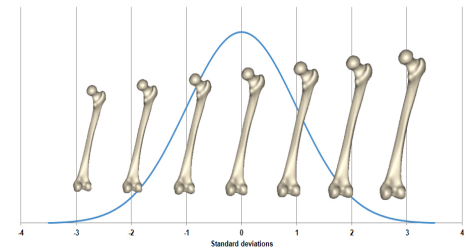

## VSD Ontology

- > Foundational Model of Anatomy
  - 75,000 anatomical classes
  - 450,000 class relations
- > Retrieve anatomical tree
  - FUSEKI server and SPARQL to query the ontology and use the semantics of the ontology
- > Example: Lower limb
  - Lower limb
  - Limb
  - Body
  - Anatomical structure

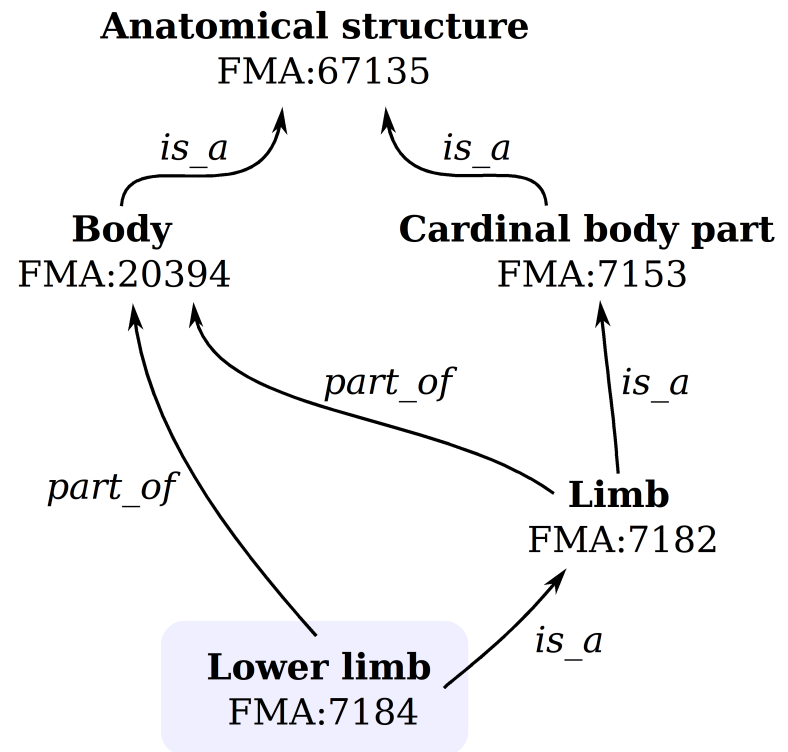



## VSD Ontology

- > Foundational Model of Anatomy
  - 75,000 anatomical classes
  - 450,000 class relations
- > Retrieve anatomical tree
  - FUSEKI server and SPARQL to query the ontology and use the semantics of the ontology
- > Example: Lower limb
  - Lower limb
  - Limb
  - Body
  - Anatomical structure

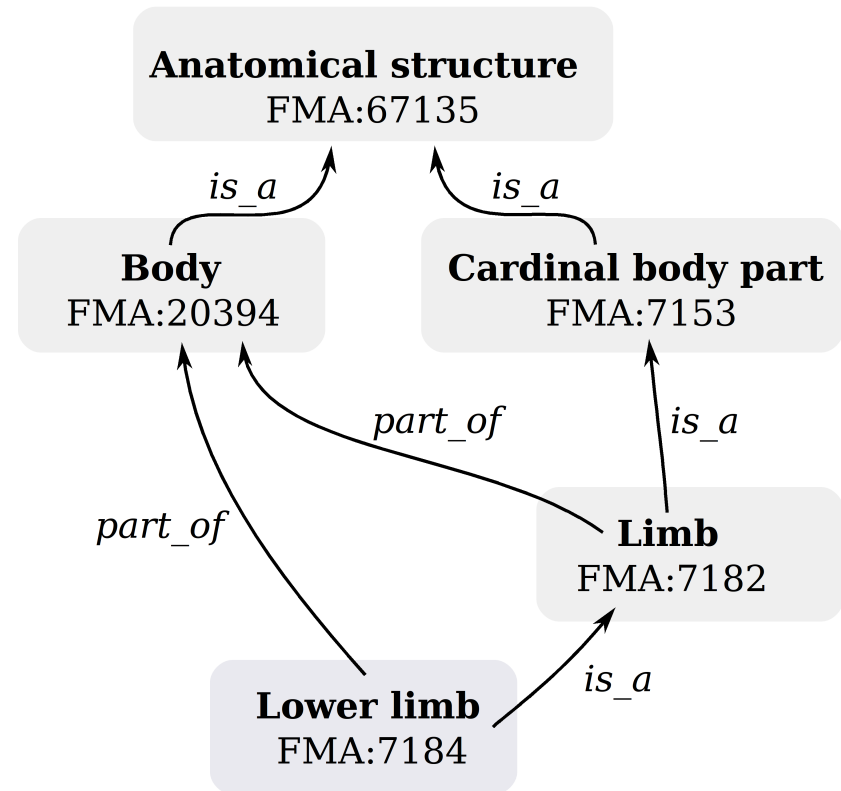

## VSD Discussion

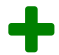

- Known software components
- Fit in curriculum
- Flexibility
- Specific requirements

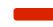

- Longer initial development
- Less content
- Not as tested
- Code not shared with the community

### > Outlook

- More content
- REST api
- Additional object types  
(landmarks, surface model,  
FE model)

### > VSD

- Tailored solution for images  
and statistical models
- Flexible concepts - BRATS
- Lack of impressive content  
(Full body scanned)

## VSD Contributors

- > BFH - M. Pfahrer, N. Biedermann, R. Niklaus, V. Tomas, R. Mitra
- > Stalismo - PhD M. Luethi
- > Forensic Institute - Prof. M. Thali, PhD L. Ebert
  
- > NCCR – CO-ME Research Network
- > SiCAS Foundation

VSD: [www.virtualskeleton.ch](http://www.virtualskeleton.ch)  
VSD demo: [vsddemo.bfh.ch/website](http://vsddemo.bfh.ch/website)

### Search Filter

### Places

-  MyData
-  MyGroups
-  MyProjects

### SharedFolders

### Page Navigation

-  Page-Top
-  Page-Bottom

### Organizer

- shared
- collaboration
- personal

VSD »

## Browse/Results

Actions ▾ Manage selected ▾ Display selected ▾

|                          |                                                                                     |                                            |                                                                                                                                                                                                                                                                                                                                                                                                                                               |                |                             |
|--------------------------|-------------------------------------------------------------------------------------|--------------------------------------------|-----------------------------------------------------------------------------------------------------------------------------------------------------------------------------------------------------------------------------------------------------------------------------------------------------------------------------------------------------------------------------------------------------------------------------------------------|----------------|-----------------------------|
| <input type="checkbox"/> |    | VSD.Bulb_of_aorta.XX.O.OT.15.000.mha       |                | ☆☆☆☆☆ RAW .mha |                             |
| <input type="checkbox"/> |    | VSD.Esophageal_artery.050Y.M.CT.10.000.dcm |                | ☆☆☆☆☆ RAW .dcm |                             |
| <input type="checkbox"/> |   | VSD.Fascia_organ.XX.XX.OT.7.000.dcm        |                | ☆☆☆☆☆ SEG .dcm |                             |
| <input type="checkbox"/> |  | VSD.Fascia_organ.XX.XX.OT.6.000.mhd        |      | ☆☆☆☆☆ SEG .mhd | 05.06.2013 19:32:32<br>demo |
| <input type="checkbox"/> |  | VSD.Anastomosis.XX.O.OT.4.000.nii          |      | ☆☆☆☆☆ RAW .nii | 05.06.2013 19:29:48<br>demo |
| <input type="checkbox"/> |  | VSD.Bronchial_vein.045Y.M.CT.1.000.dcm     |      | ☆☆☆☆☆ RAW .dcm | 05.06.2013 19:22:53<br>demo |

VSD name: identifier

- VSDID
- anatomical region
- age
- modality

Details

- sharing
- comments
- versions
- related data
- previews
